# Supplementary material for: An advanced plasmonic bimetallic nanostar composite for ultra-sensitive SERS detection of crystal violet
Source: Royal Society of Chemistry journal article supplement (doi:10.1039/d4nr03299c), 2024-11-21
Supplement: d4nr03299c1.pdf [file d4nr03299c1.pdf]

### Supporting Supplementary Information

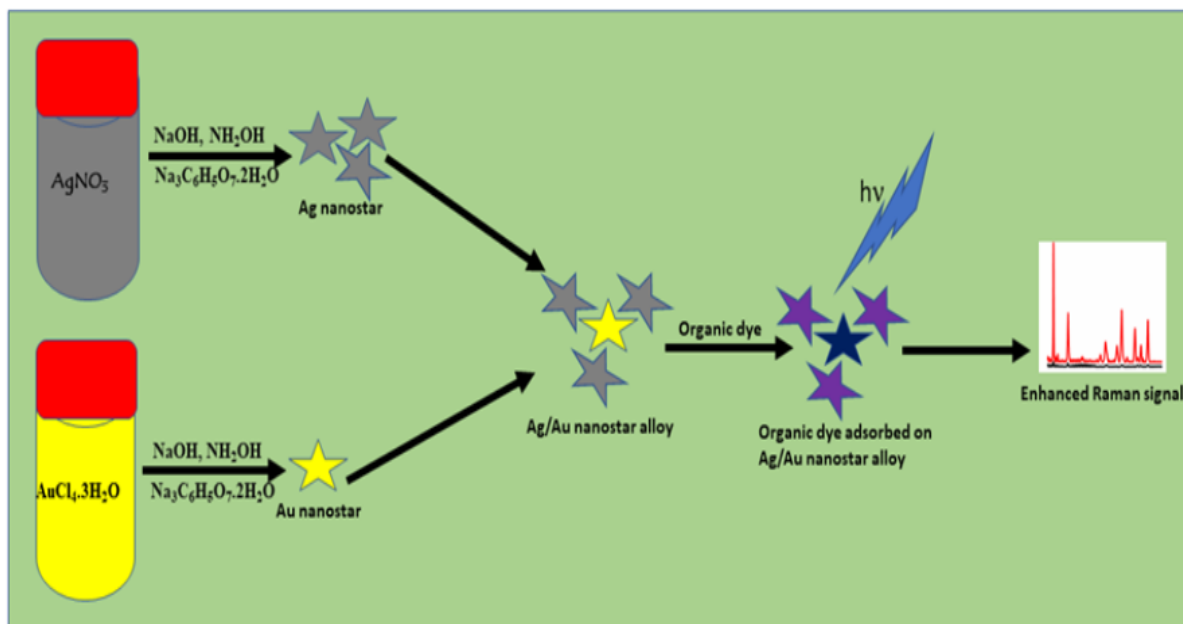

**Fig. 1:** Synthesis procedure and enhanced Raman effect of Ag/Au nanostar composite

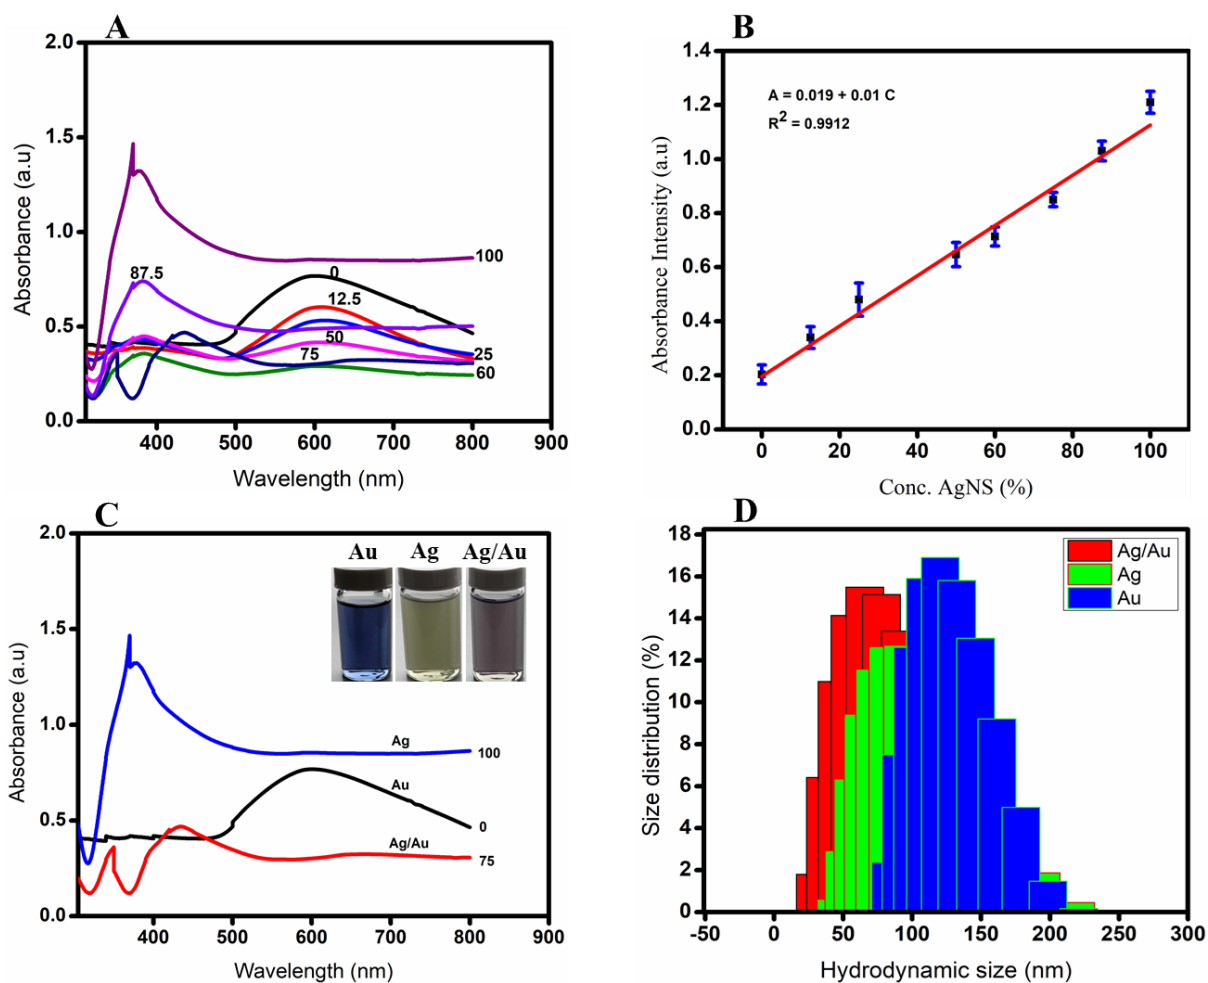

**Fig. 2:** Absorption spectra of (A) Ag/Au nanostar composite as a function of the percentage of Ag  
 B) calibration plot of AgNS composition vs absorbance at 368 nm, (C) Absorption spectra of AgNS  
 (pure), AuNS (pure), Ag/Au nanostar (75:25) (Inset: photo image for Au, Ag and Ag/Au colloids) and  
 D) Histogram of size distributions for Ag, Au and Ag/Au nanostar particles.

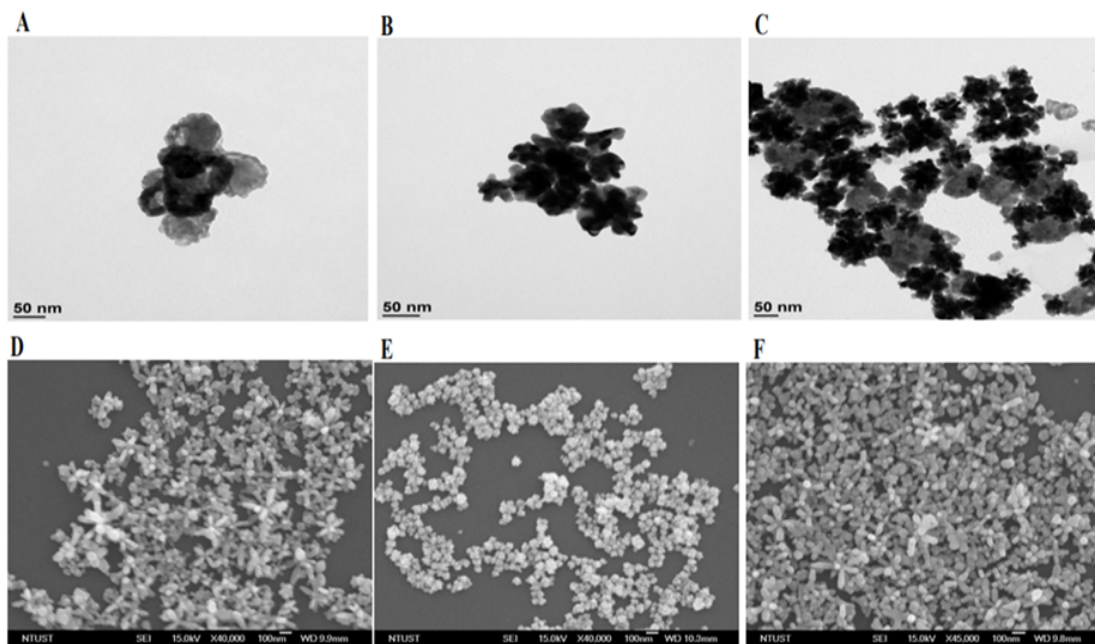

**Fig. 3:** TEM (A-C) and SEM (D-F) images of AgNS, AuNS and Ag/Au nanostar composites, respectively

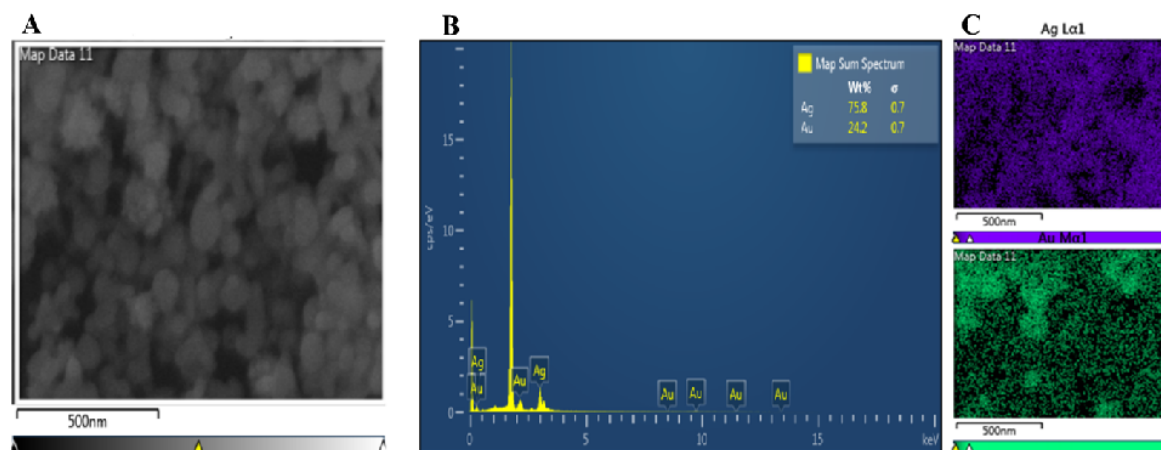

**Fig. 4:** SEM image (A), EDS spectrum of Au and Ag (B) and the separated SEM elemental mapping of Ag and Au (C)

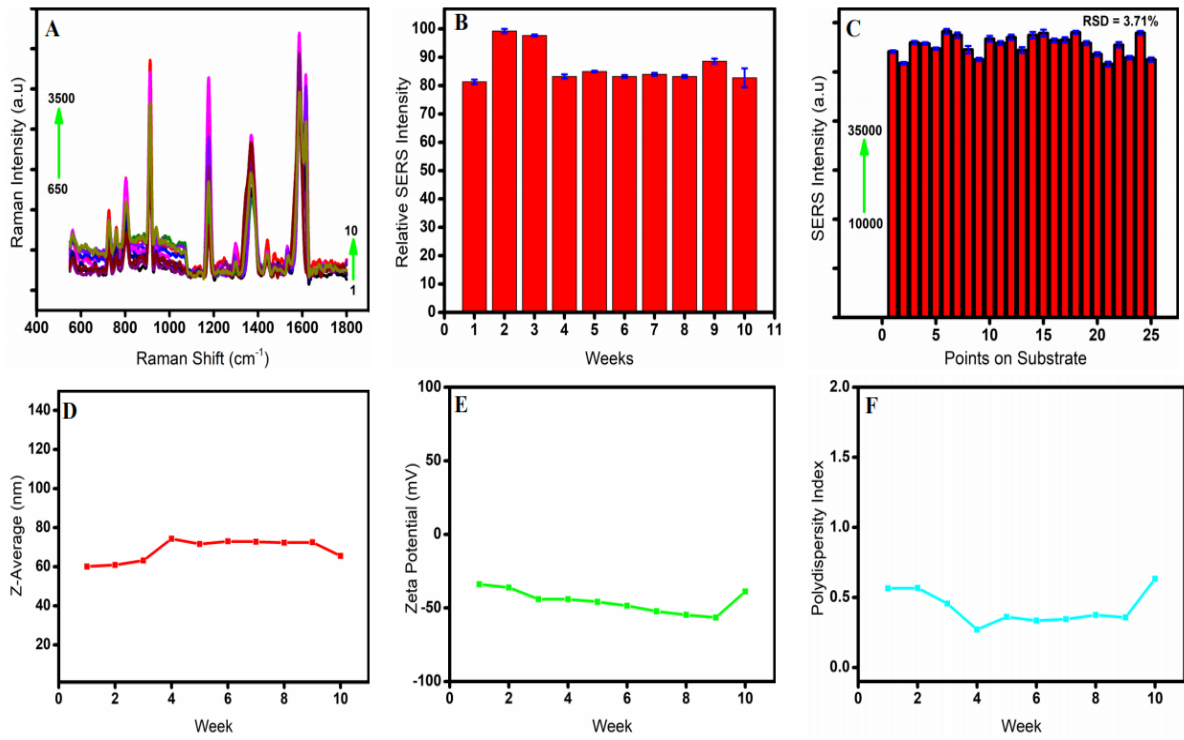

**Fig. 5:** (A) Actual and (B) relative SERS spectra of R6G ( $10^{-9}$  M) for a duration of 10 weeks, (C) Signal reproducibility of Ag/Au nanostar composite substrate at 25 spots, (D) hydrodynamic size, (E) zeta potential and (F) polydispersity index of the Ag/Au nanostar composite for a duration of 10 weeks

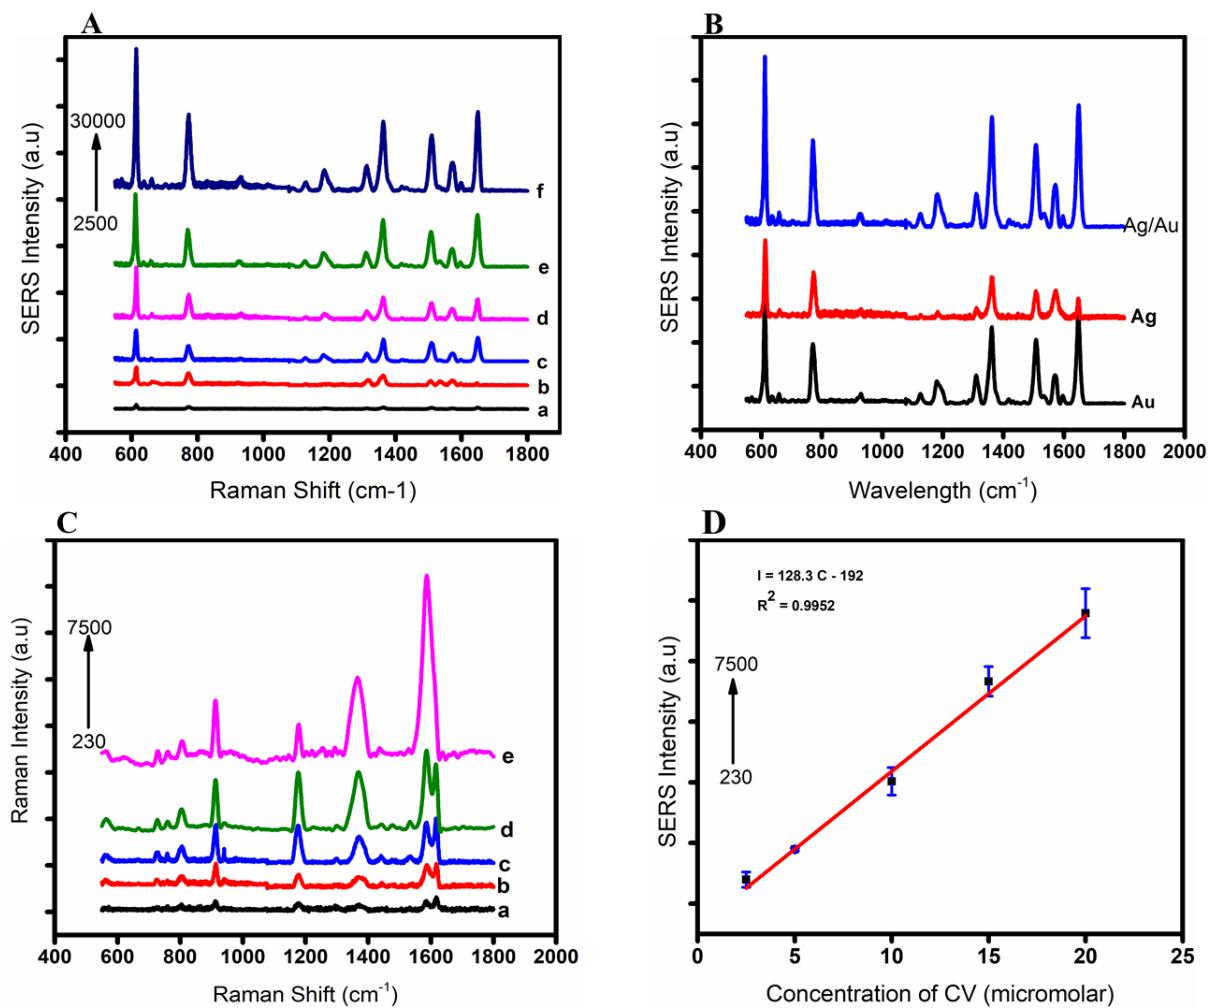

**Fig. 6:** A) SERS spectra of R6G on Ag/Au (75:25) nanostar composite substrate at concentrations of a) 1 M (on bare silica), b)  $10^{-15}$  M, c)  $10^{-12}$  M, d)  $10^{-9}$  M, e)  $10^{-6}$  M, and f)  $10^{-3}$  M B) SERS spectra of  $10^{-6}$  M R6G on AgNS, AuNS and Ag/Au nanostar composite substrate C) SERS spectra of CV at concentrations of a) 2.5, b) 5, c) 10, d) 15 and e) 20 micromolar D) linear calibration plot of CV
